# Supplementary figures and images for: Enhanced broadband spectral response and energy conversion efficiency for hetero-junction solar cells with graded-sized Si quantum dots/SiC multilayers
Source: Royal Society of Chemistry journal article supplement (doi:10.1039/c5tc02585k), 2015-01-01

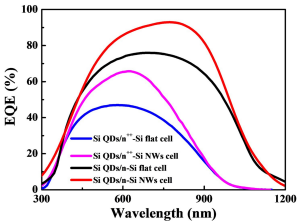

Supplement: c5tc02585k4.pdf [file c5tc02585k4.pdf]
